# Supplementary material for: Application of Machine Learning to Ranking Predictors of Anti-VEGF Response
Source: MDPI journal article supplement (doi:10.3390/life12111926), 2022-11-18
Supplement: s1 [file s1]

## Supplementary Materials

### *1. Acronyms*

AIC: Akaike Information Criteria

AMD: Age-related macular degeneration

Anti-VEGF: Anti-Vascular Endothelial Growth Factors

BIC: Bayesian Information Criteria

CMT: Central macular thickness

CNV: Choroidal neovascularization

EM: Expectation-maximization

ETDRS: Early Treatment Diabetic Retinopathy Study

GA: Geographic Atrophy

IRF: Intra-retinal fluid

LE: Left eye

MAD: Mean Absolute Deviation

MAPE: Mean Absolute Percentage Error

MCMC: Markov Chain Monte Carlo

ME: Mean error

MI: Multiple imputation

MPE: Mean Percentage Error

nAMD: Neovascular AMD.

OCT: Optical coherence tomography

PED: Pigment epithelium detachment

RE: Right eye

RIV: Relative importance of variables

RMSE: Root Mean Square Error

RVEEH: Royal Victorian Ear and Eye Hospital

SHRM: Subretinal hyperreflective material

SRF: Sub-retinal fluid

SD: Standard deviation

VA: Visual Acuity

## 2. Data Management and Processing

Statistical analysis was carried out using software coded in R version 3.2.2. Treatment of missing values, for MI and stacked MI methods was carried out using the R package *Amelia*. If not stated otherwise, the `lme4()` package due to Bates & Maechler and maintained by Ben Bolker was used in the creation and analysis of the linear mixed-effects models. Variable definitions, types and routines used are referenced in the following tables.

**Table S1. Description of potential predictor variables included in the dataset**

| Variable                        | Type        | Input Name              |
|---------------------------------|-------------|-------------------------|
| VA scores at baseline           | Continuous  | Baseline VA LE: bcva_le |
|                                 |             | Baseline VA RE: bcva_re |
| Time of appointment (in weeks)  |             | time_weeks              |
| Anti-VEGF treatment protocol    | Categorical | treatment_drug          |
| Treatment number                | Continuous  | treat_qty               |
| Treated eye                     | Categorical | treated_eye             |
| OCT presence of IRF and SRF     | Categorical | oct_irf; oct_srf        |
| CMT                             | Continuous  | oct_cmt                 |
| PED                             | Binary      | oct_ped_cnv             |
| Haemorrhage                     | Binary      | oct_hemorrhage          |
| Hypertension                    | Binary      | hypertension            |
| Diabetes                        | Binary      | Diabetes                |
| Smoking status                  | Categorical | smoking_status          |
| Smoker packs                    | Continuous  | smokerpacks             |
| Age                             | Continuous  | Age                     |
| Gender                          | Binary      | Gender                  |
| Maternal and paternal ethnicity | Categorical | ethnicity_mom           |
|                                 |             | ethnicity_dad           |

CMT: Central macular thickness; OCT: Optical coherence tomography; IRF: Intra-retinal fluid; PED: Pigment epithelium detachment; SRF: Sub-retinal fluid; VEGF: Vascular Endothelial Growth Factors.

**Table S2. Potential predictor variables for LE and RE modelling based on multiple imputed datasets.**

| Imputed Dataset | Potential Predictor Variables using five imputed datasets                                                   |
|-----------------|-------------------------------------------------------------------------------------------------------------|
| <b>LE</b>       |                                                                                                             |
| 1               | le_bcva_BL, diabetes, smoking_status, time_weeks, treat_qty, treated_eye                                    |
| 2               | le_bcva_BL, diabetes, oct_ped_cnv, time_weeks, treat_qty, treated_eye                                       |
| 3               | le_bcva_BL, diabetes, oct_ped_cnv, time_weeks, treat_qty, treated_eye                                       |
| 4               | le_bcva_BL, diabetes, time_weeks, treat_qty, treated_eye                                                    |
| 5               | le_bcva_BL, diabetes, oct_irf, time_weeks, treat_qty, treated_eye                                           |
|                 |                                                                                                             |
| <b>RE</b>       |                                                                                                             |
| 1               | re_bcva_BL, age, oct_cmt, smoking_status, time_weeks, treat_qty, treated_eye, treatment_drug                |
| 2               | re_bcva_BL, age, oct_cmt, smoking_status, ethnicity_dad, time_weeks, treat_qty, treated_eye, treatment_drug |
| 3               | re_bcva_BL, age, oct_cmt, smoking_status, ethnicity_dad, time_weeks, treat_qty, treated_eye                 |
| 4               | re_bcva_BL, age, oct_cmt, smokerpacks, time_weeks, treat_qty, treated_eye, treatment_drug                   |
| 5               | re_bcva_BL, age, oct_cmt, smokerpacks, time_weeks, treat_qty, treated_eye, treatment_drug                   |

**Table S3. Potential predictor variables for LE and RE modelling based on stacked imputed dataset.**

|           | Potential predictor variables identified using the stacked imputation method                                                             |
|-----------|------------------------------------------------------------------------------------------------------------------------------------------|
| <b>LE</b> | le_bcva_BL, oct_cmt, oct_irf, oct_ped_cnv, re_bcva_BL, time_weeks, treat_qty, treated_eye, treatment_drug                                |
|           |                                                                                                                                          |
| <b>RE</b> | re_bcva_BL, hypertension, age, le_bcva_BL, oct_cmt, oct_hemorrhage, oct_irf, oct_srf, smokerpacks, time_weeks, treat_qty, treatment_drug |
